# Supplementary material
Source: publisher figshare collection journal article supplement (https://gsajournals.figshare.com/articles/dataset/_/14885733)
Supplement: Supplementary file 1 [file 2]

A

## Annotation

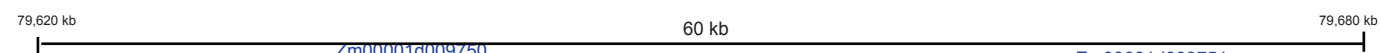H3K56ac  
[0 - 102]

H3K4me3

H3K36me3  
[0 - 153]

H3K4me1

## Annotation

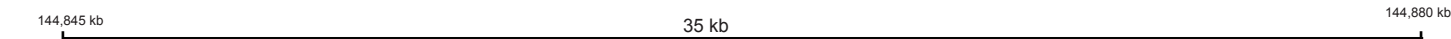H3K56ac  
[0 - 141]

H3K4me3

H3K36me3  
[0 - 171]

H3K4me1

Concordant

B

## Annotation

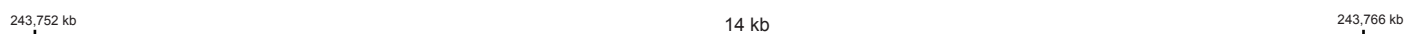

H3K56ac

H3K4me3

H3K36me3

H3K4me1

## Annotation

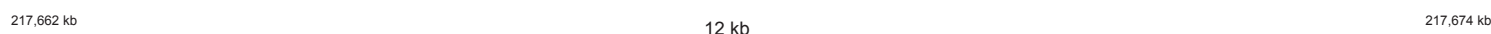H3K56ac  
[0 - 157]

H3K4me3

H3K36me3  
[0 - 181]

H3K4me1

Discordant
