# Supplementary material
Source: publisher figshare collection journal article supplement (https://gsajournals.figshare.com/articles/dataset/_/14885733)

A

Minor gene extension metaplots original versus updated annotation

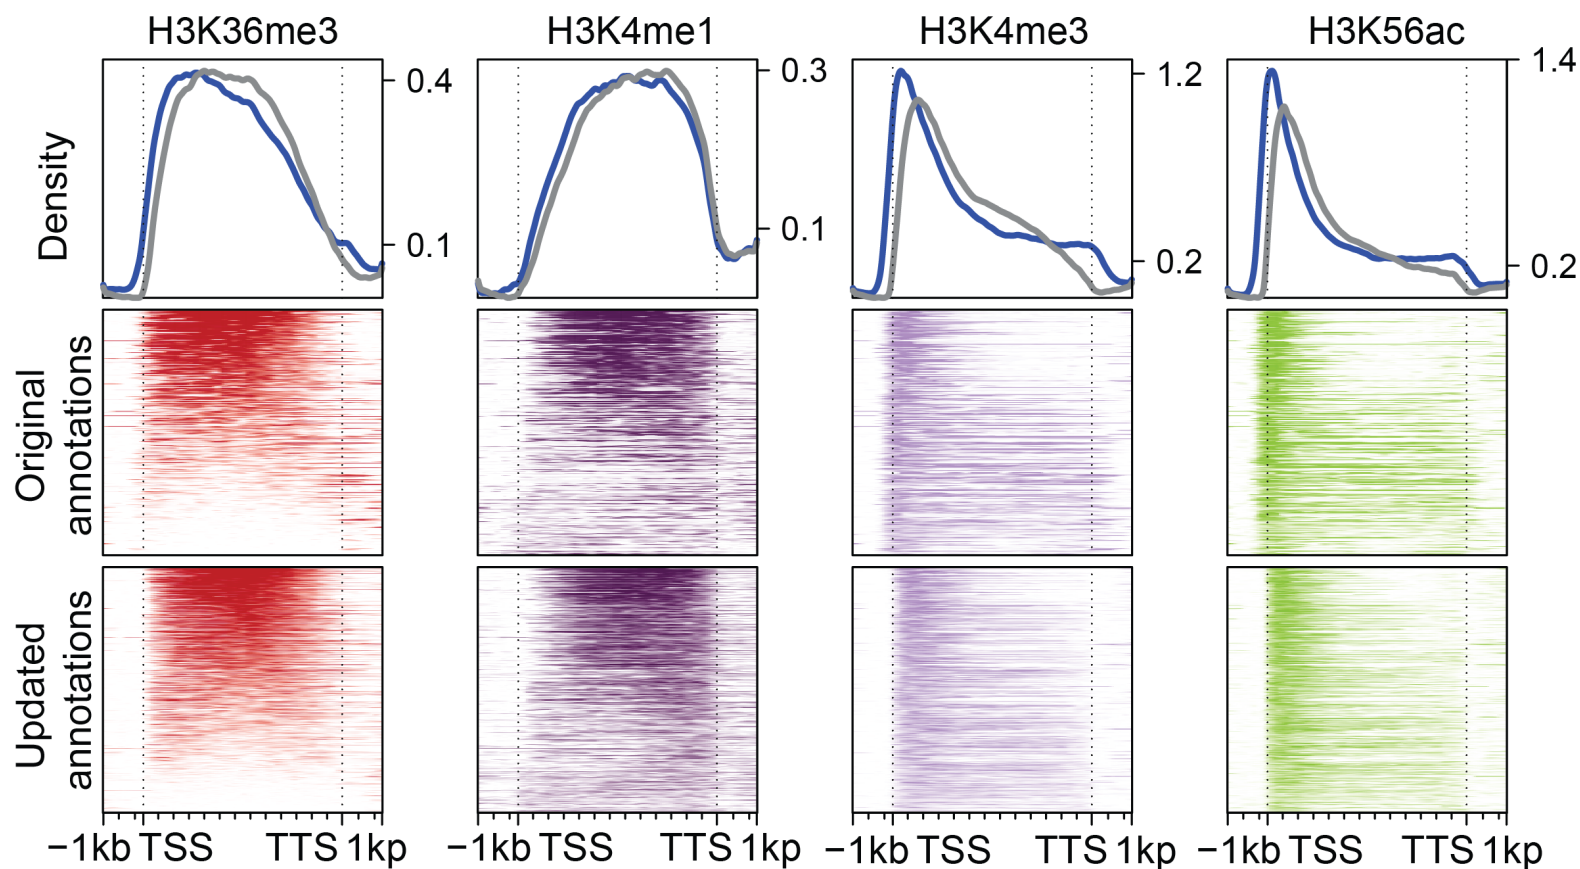

B

Major gene extension metaplots original versus updated annotation

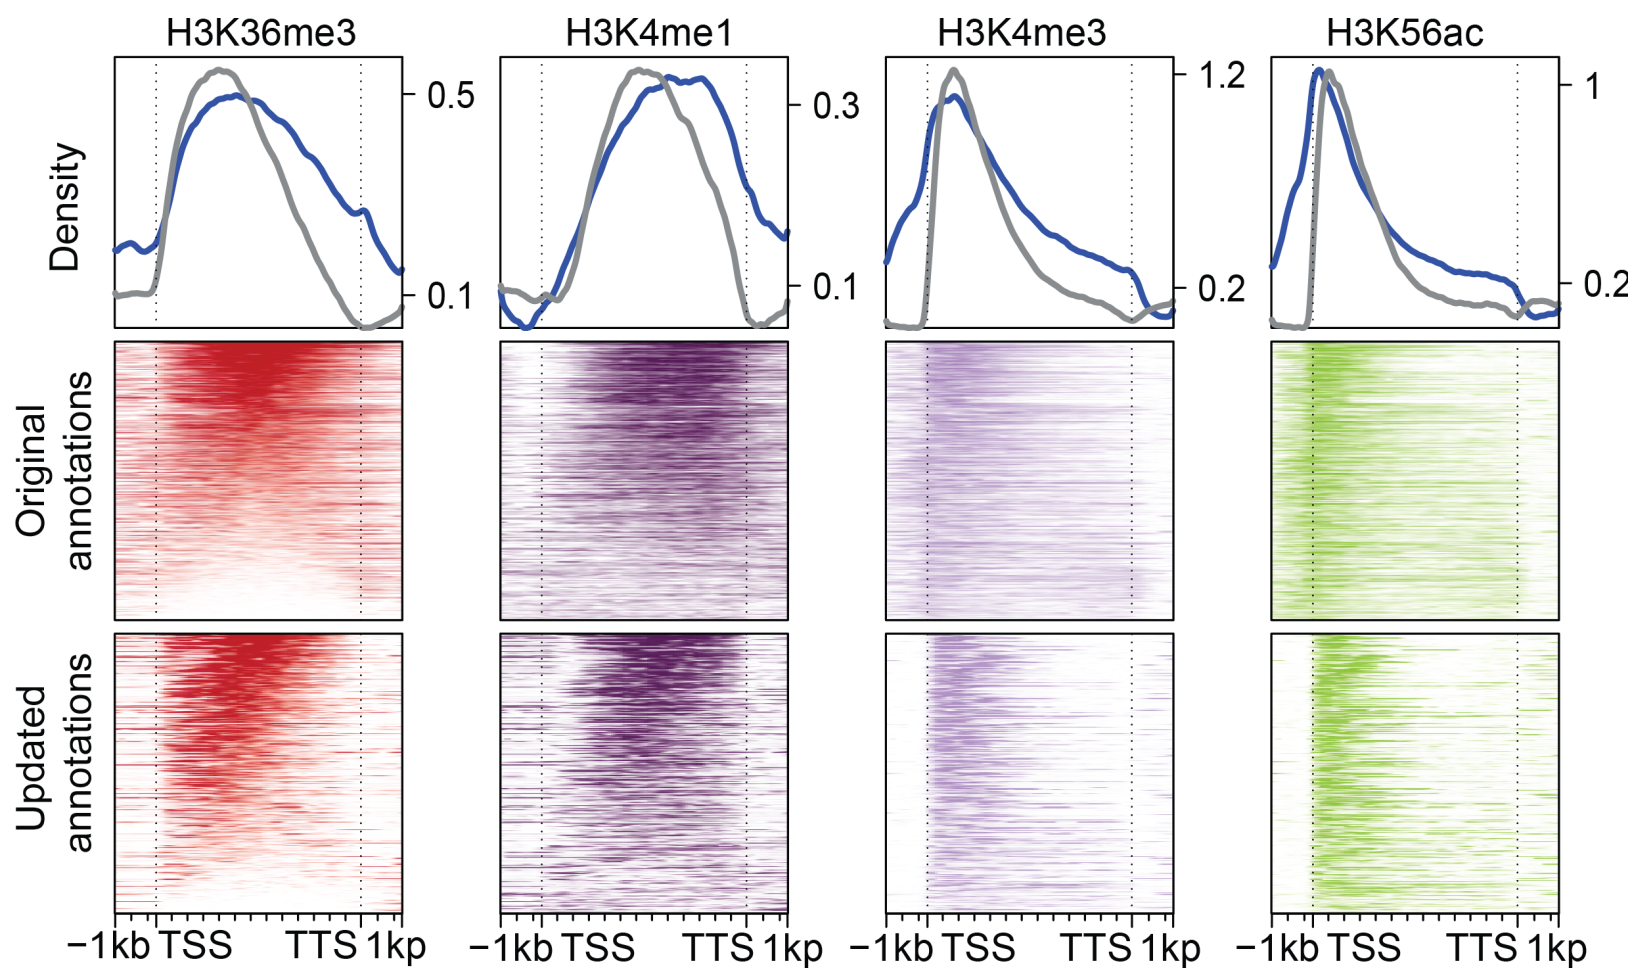

Supplement: Supplementary file 7 [file 2]
