# Supplementary material
Source: publisher figshare collection journal article supplement (https://gsajournals.figshare.com/articles/dataset/_/14885733)

A

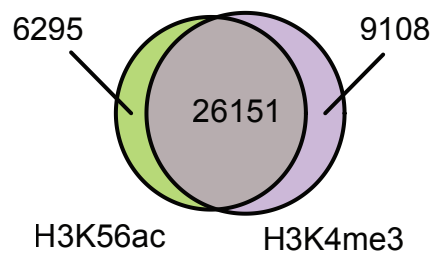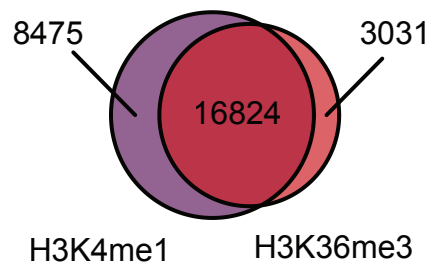

B

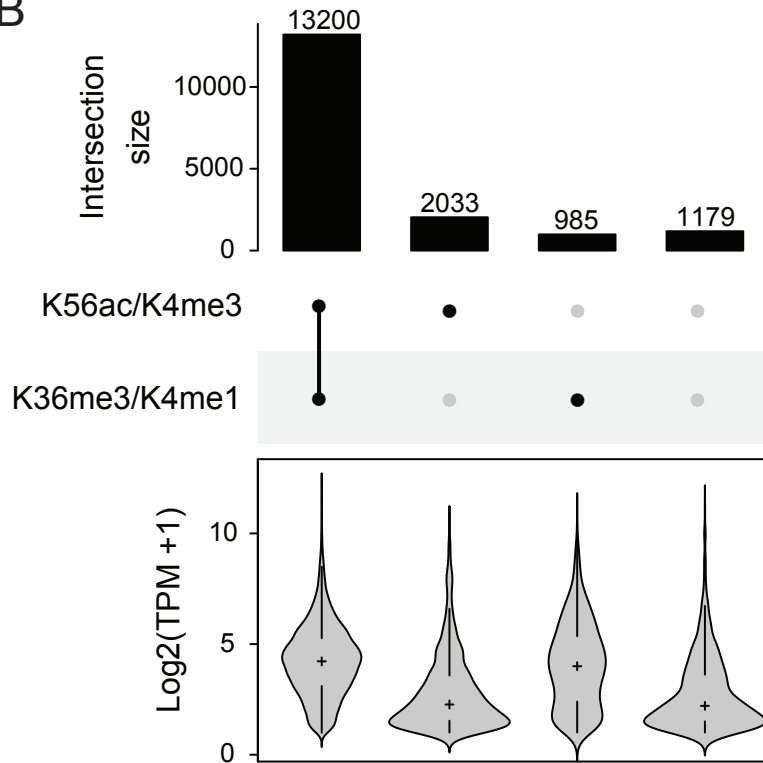

C

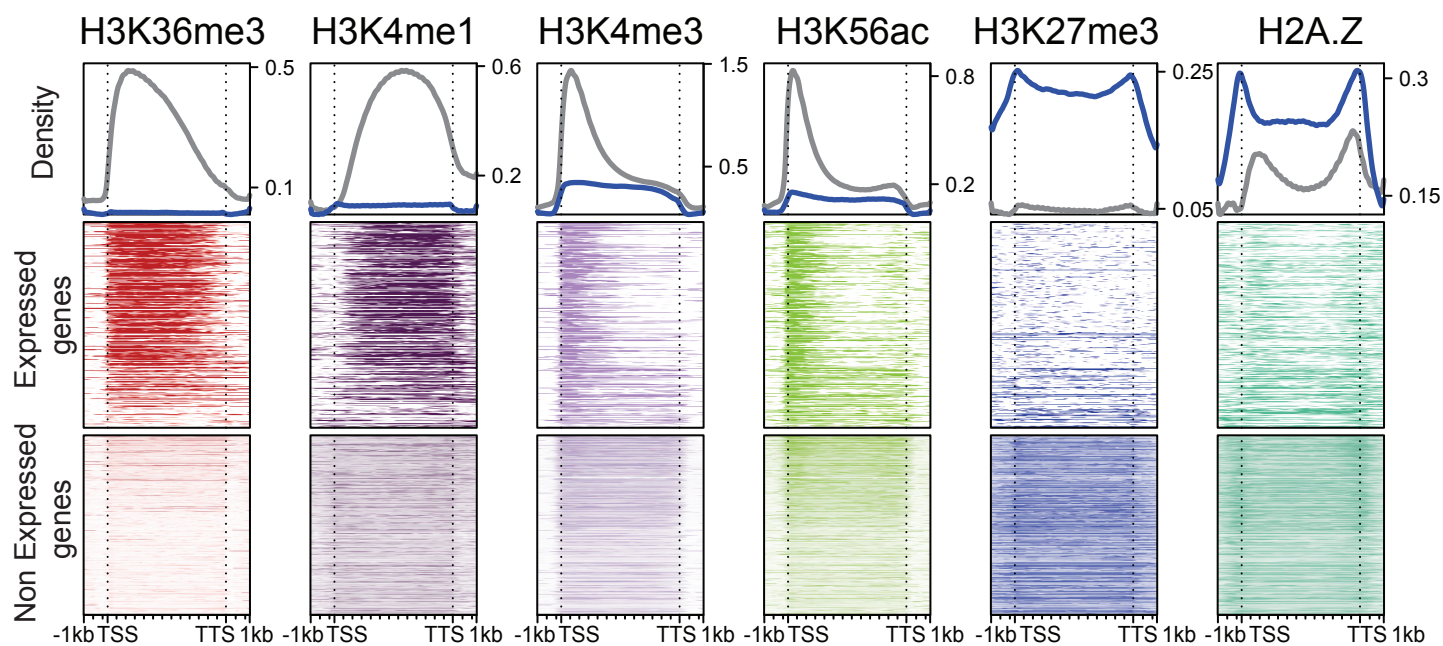

Supplement: Supplementary file 3 [file 2]

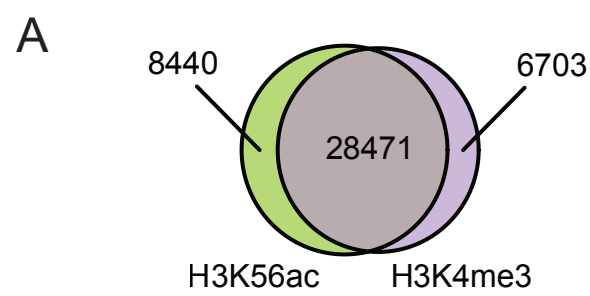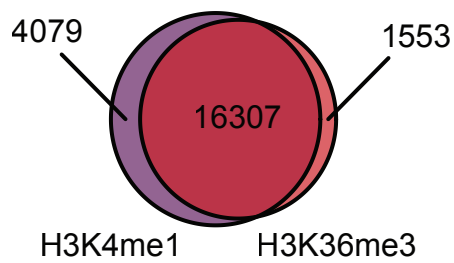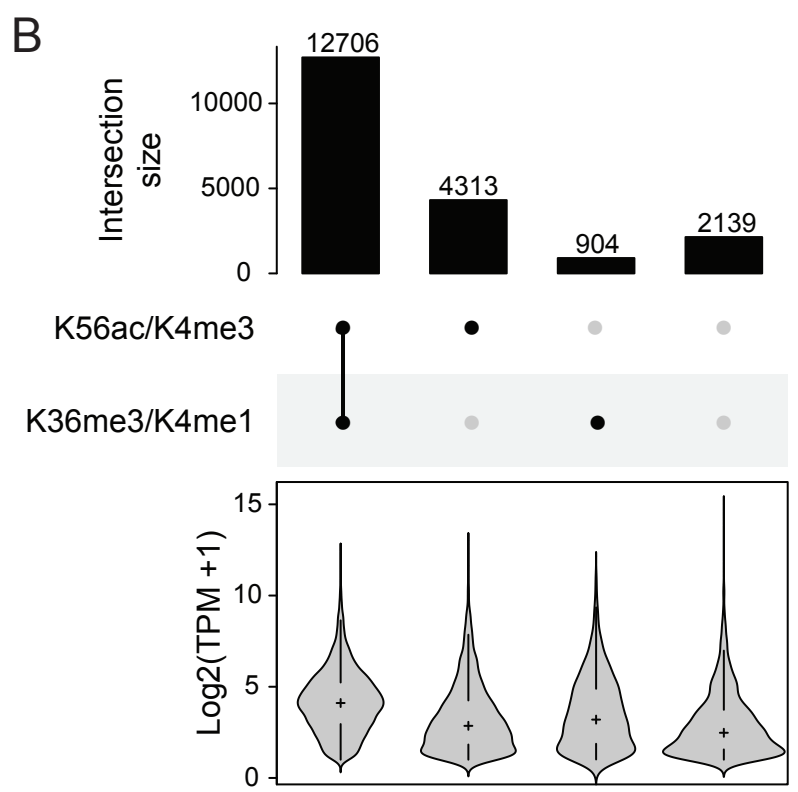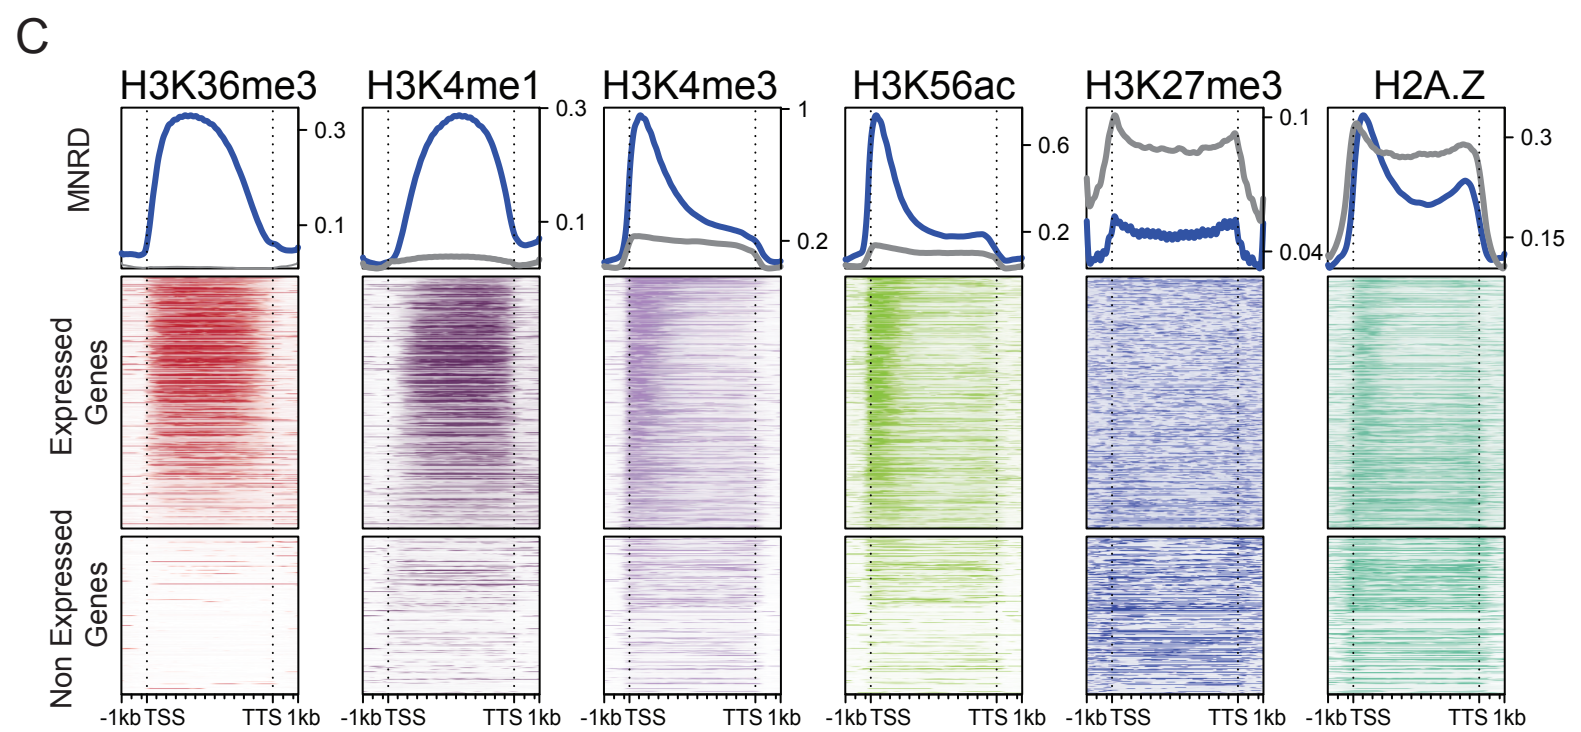

Supplement: Supplementary file 4 [file 2]

A

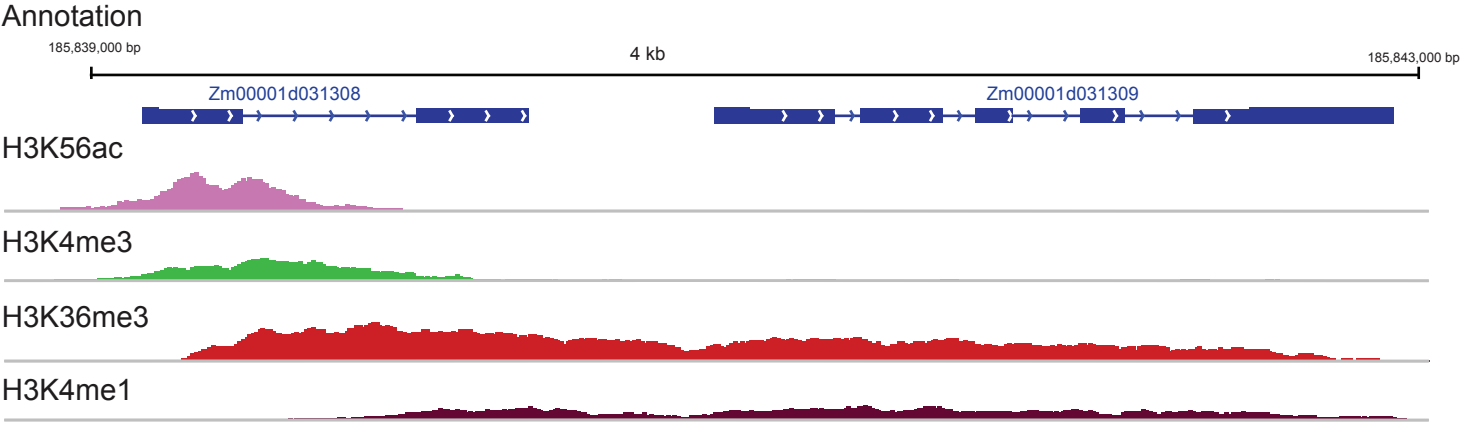

B

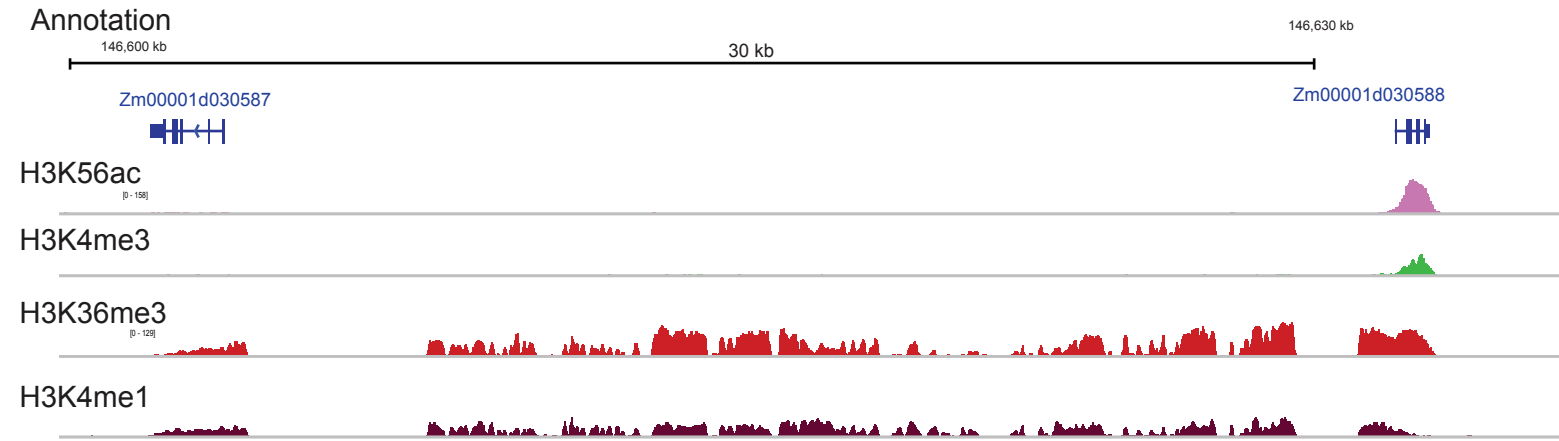

C

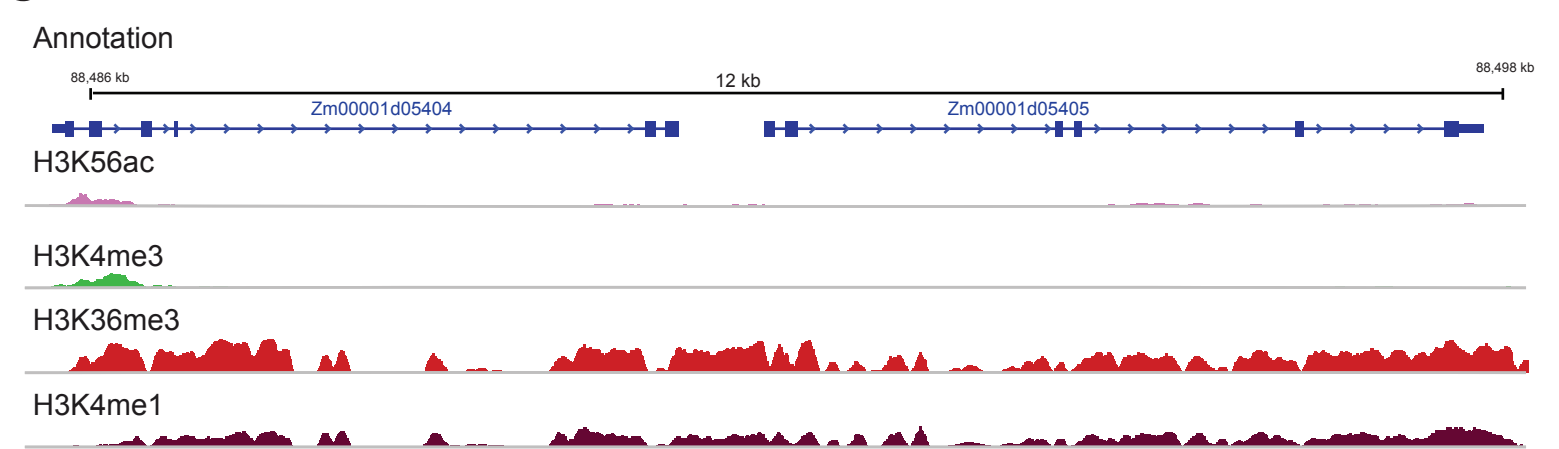

D

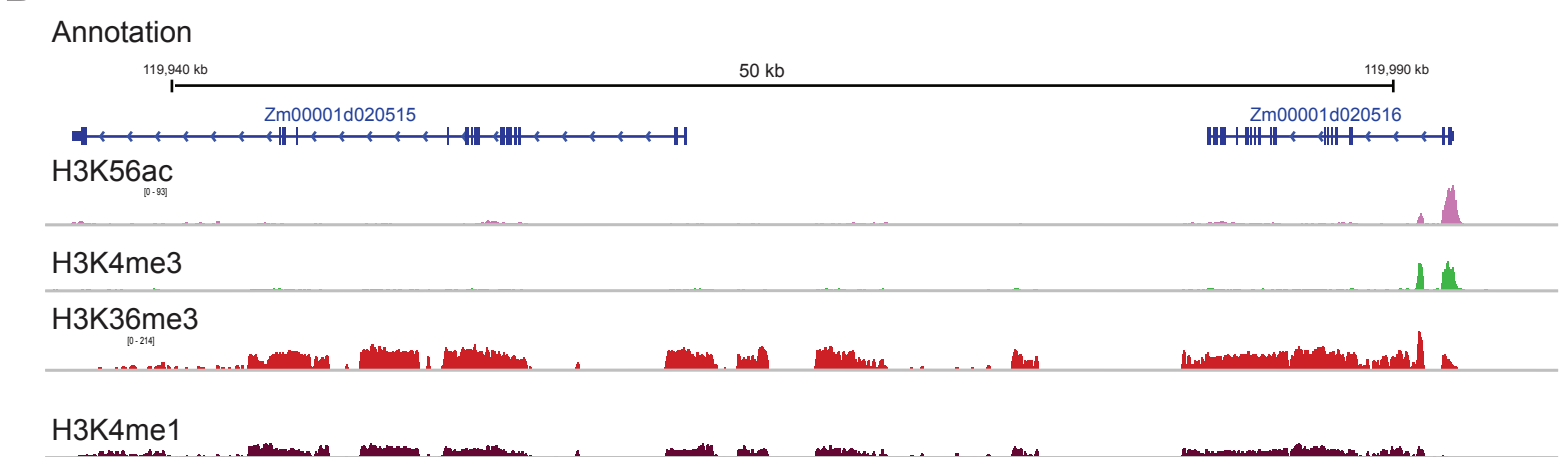

Supplement: Supplementary file 5 [file 2]

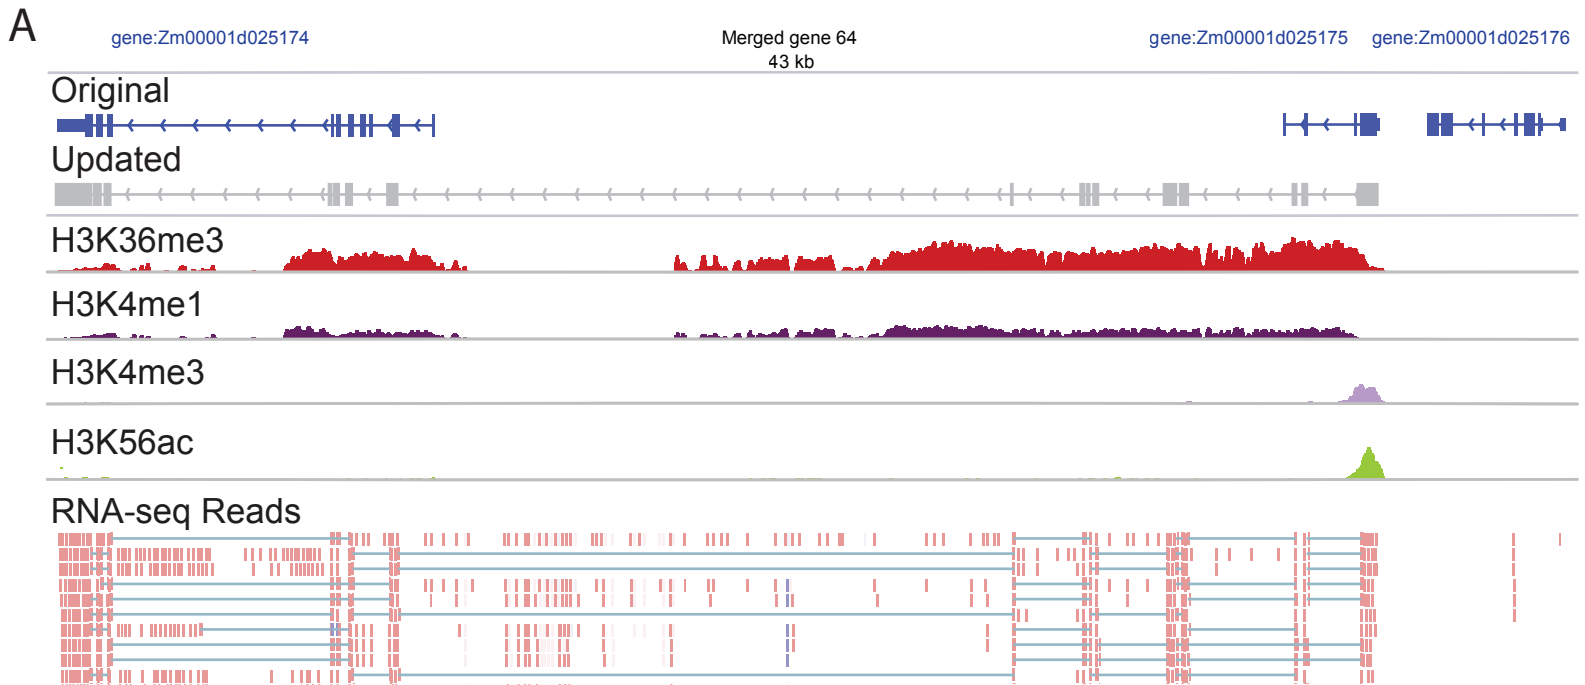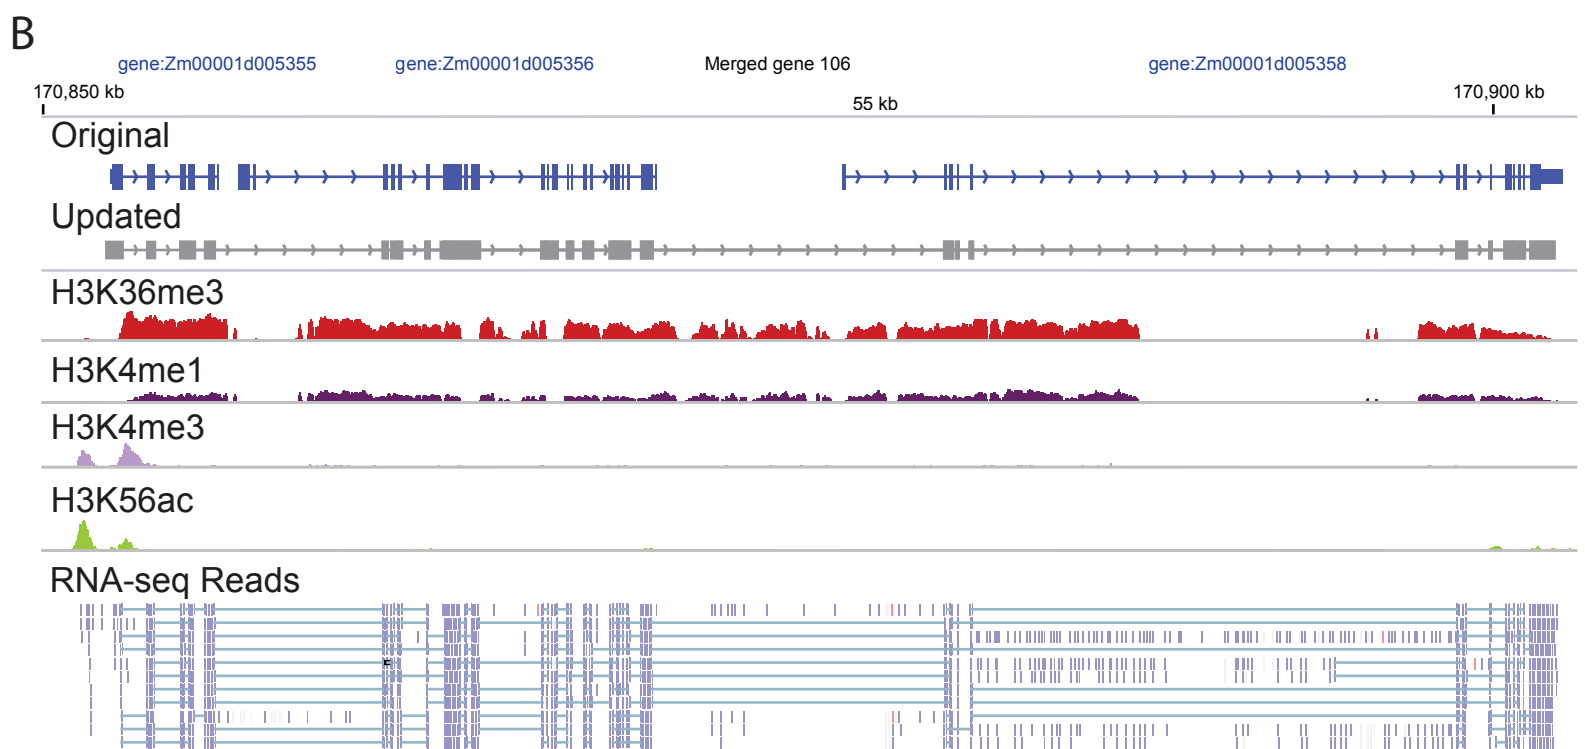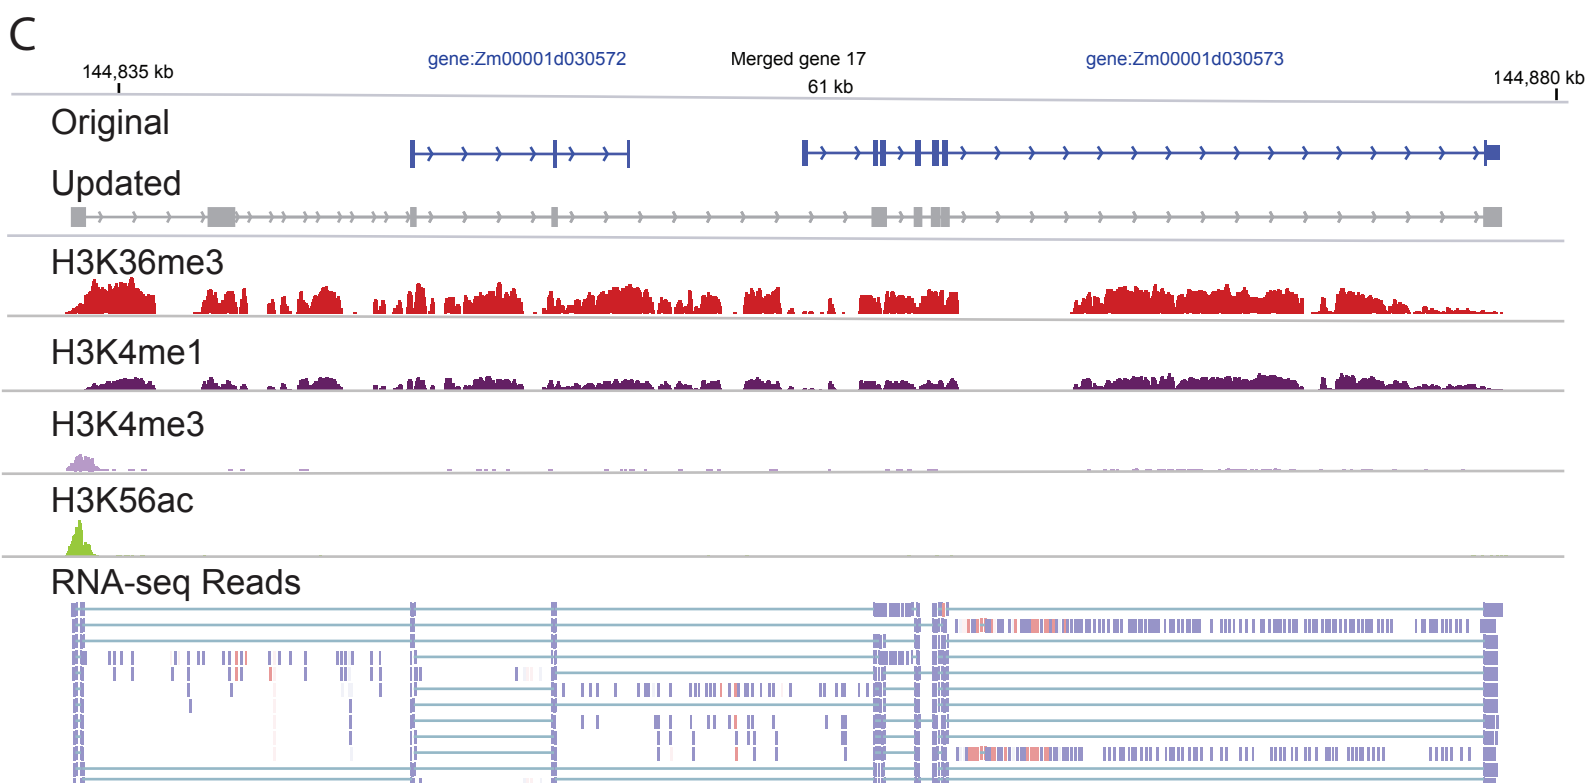

Supplement: Supplementary file 6 [file 2]

A

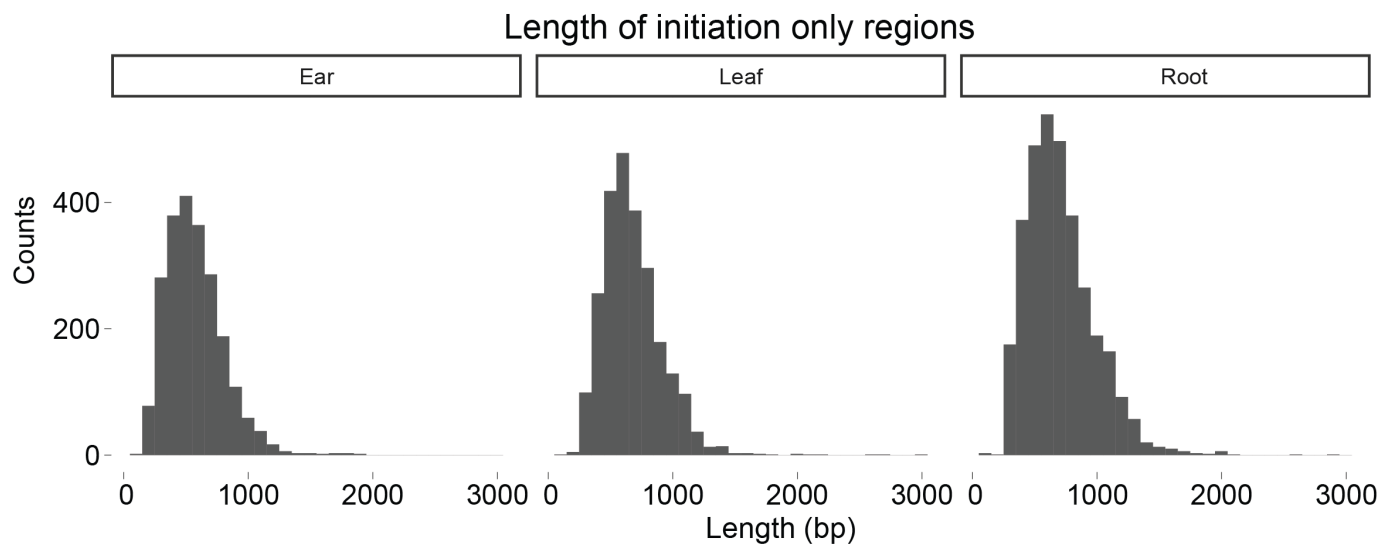

B

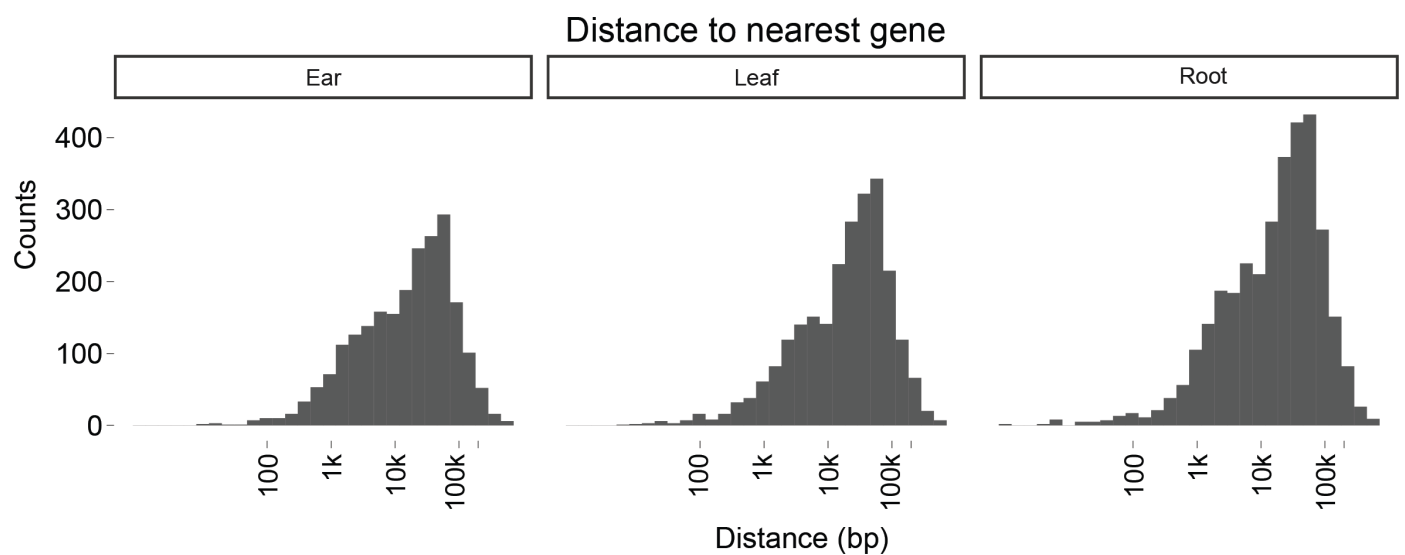

C

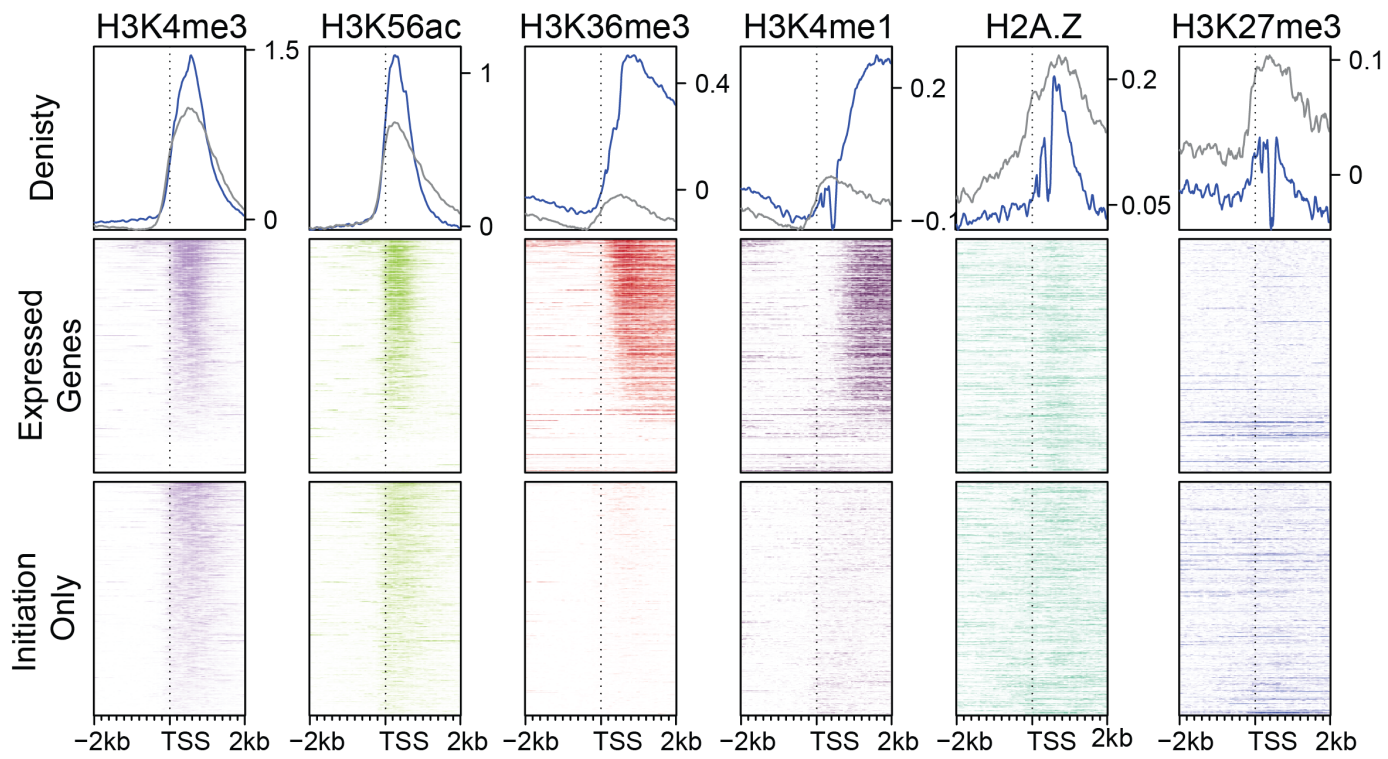

Supplement: Supplementary file 8 [file 2]
